# Supplementary material for: Laser filament bottom-up growth sintering for multi-planar diffraction-limit printing and its application to ultra-transparent wearable thermo-electronics
Source: Royal Society of Chemistry journal article supplement (doi:10.1039/c8tc01915k), 2018-01-01
Supplement: c8tc01915k1.pdf [file c8tc01915k1.pdf]

## Supplementary Information

# Laser filament bottom-up growth sintering for multi-planar diffraction-limit printing and its application to ultra-transparent wearable thermo-electronics

Seung-Gab Kwon<sup>a</sup>, Seunghyun Back<sup>a</sup>, Jong Eun Park<sup>b</sup> and Bongchul Kang<sup>a\*</sup>

<sup>a</sup> Department of Mechanical System Engineering, Kumoh National Institute of Technology (KIT), Gumi, 39177, Korea.

<sup>b</sup> Department of Mechanical Engineering, Korea Advanced Institute of Science and Technology (KAIST), Daejeon, 34141, Korea.

\* Corresponding author; E-mail: [kbc@kumoh.ac.kr](mailto:kbc@kumoh.ac.kr)

## Characterization of Bessel beam

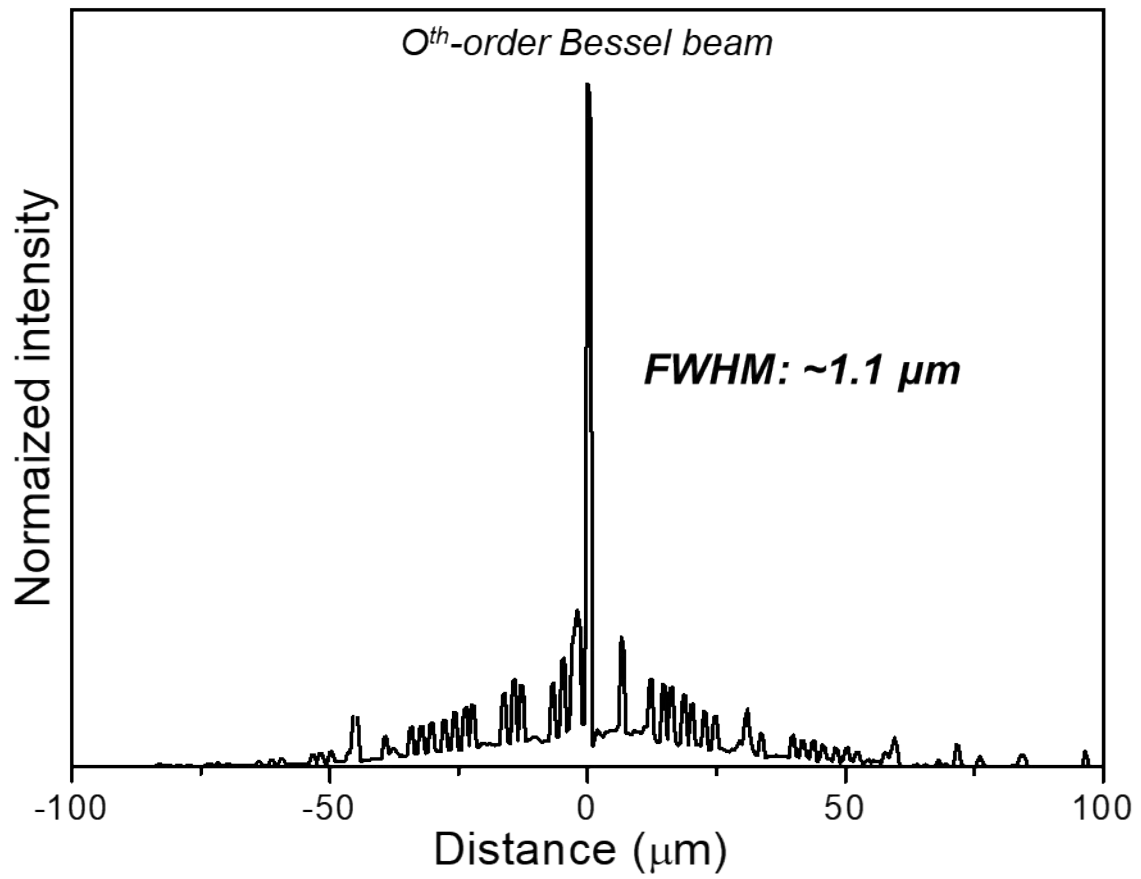

**Figure S1** Spatial intensity profile of Bessel beam using knife-edge method.

## Durability of pattern fabricated by laser filament growth sintering

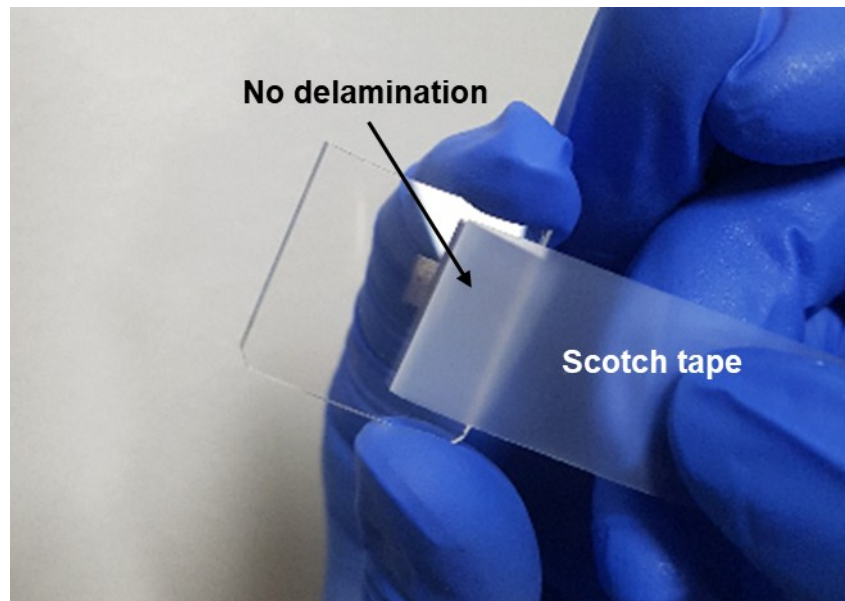

**Figure S2** Peeling-off test of specimen fabricated in a laser power of 75 mW using scotch tape.

## Laser filament growth sintering on plastic film

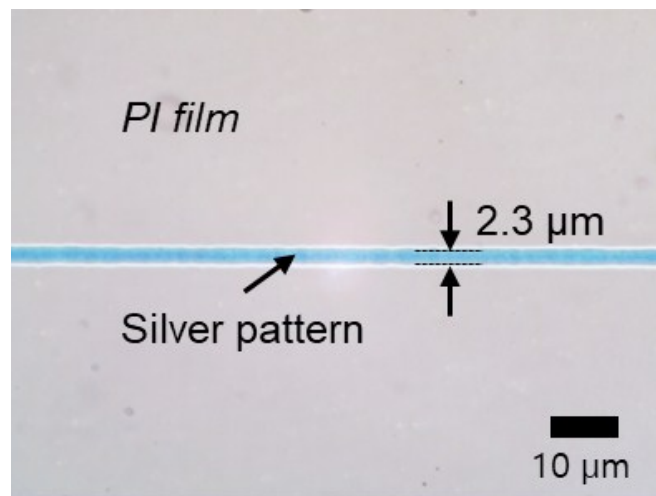

**Figure S3** Microscopy of fabricated pattern by laser filament growth sintering on polyimide film.
